# Supplementary material for: Source backtracking for dust storm emission inversion using adjoint method: case study of northeast China
Source: Copernicus journal article supplement (doi:10.5194/acp-2020-435), 2020-07-22
Supplement: Supplementary file 1 [file acp-2020-435-supplement.pdf]

# **Supplementary: Source backtracking for dust storm emission inversion using adjoint method: case study of northeast China**

Jianbing Jin<sup>1,2</sup>, Arjo Segers<sup>3</sup>, Hong Liao<sup>1</sup>, Arnold Heemink<sup>2</sup>, Richard Kranenburg<sup>3</sup>, and Hai Xiang Lin<sup>2</sup>

<sup>1</sup>Jiangsu Key Laboratory of Atmospheric Environment Monitoring and Pollution Control, Collaborative Innovation Center of Atmospheric Environment and Equipment Technology, School of Environmental Science and Engineering, Nanjing University of Information Science and Technology, Nanjing, China

<sup>2</sup>Delft Institute of Applied Mathematics, Delft University of Technology, Delft, the Netherlands

<sup>3</sup>TNO, Department of Climate, Air and Sustainability, Utrecht, the Netherlands

**Correspondence:** Jianbing Jin (jianbing.jin@nuist.edu.cn)

## **1 Supplementary**

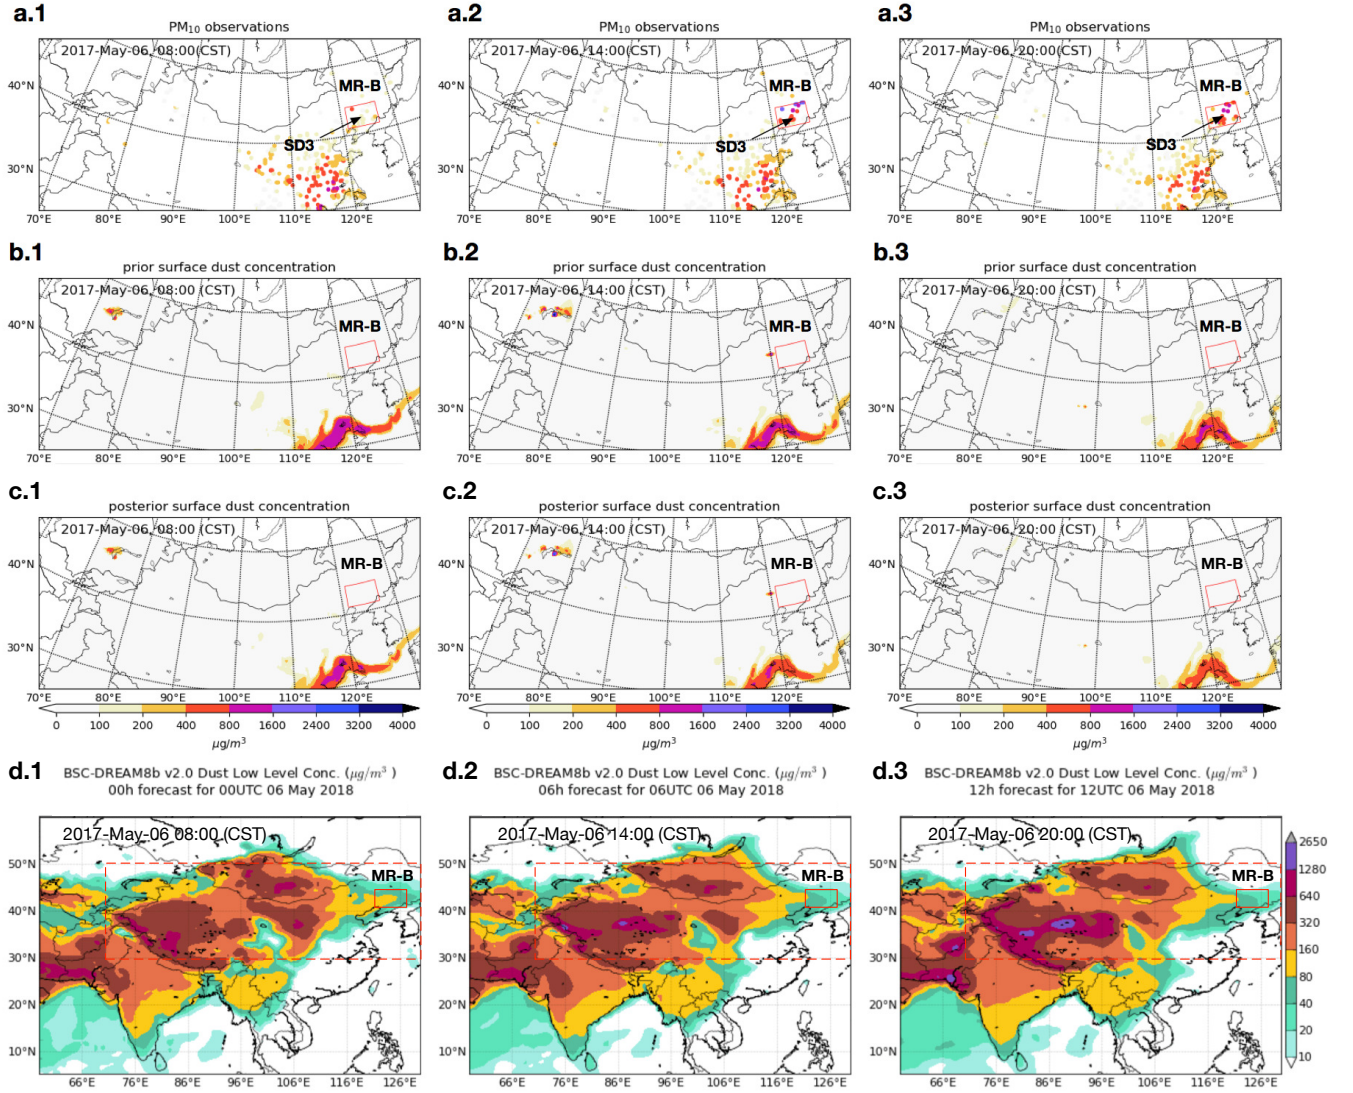

**Figure S1.** PM<sub>10</sub> observations (a.1~a.3) vs. surface dust concentration simulation of the 3rd severe dust (SD3) from Lotos-Euros prior (b.1~b.3), posterior (c.1~c.3) and BSC-DREAM8b (d.1~d.3) over the marked region B (MR-B) at May 06 08:00 (CST): a.1~d.1; 14:00 (CST): a.2~d.2; 20:00 (CST): a.3~d.3.

### Sensitivities to dust simulation at MR2\_14 2017-05-06 19:00 CST

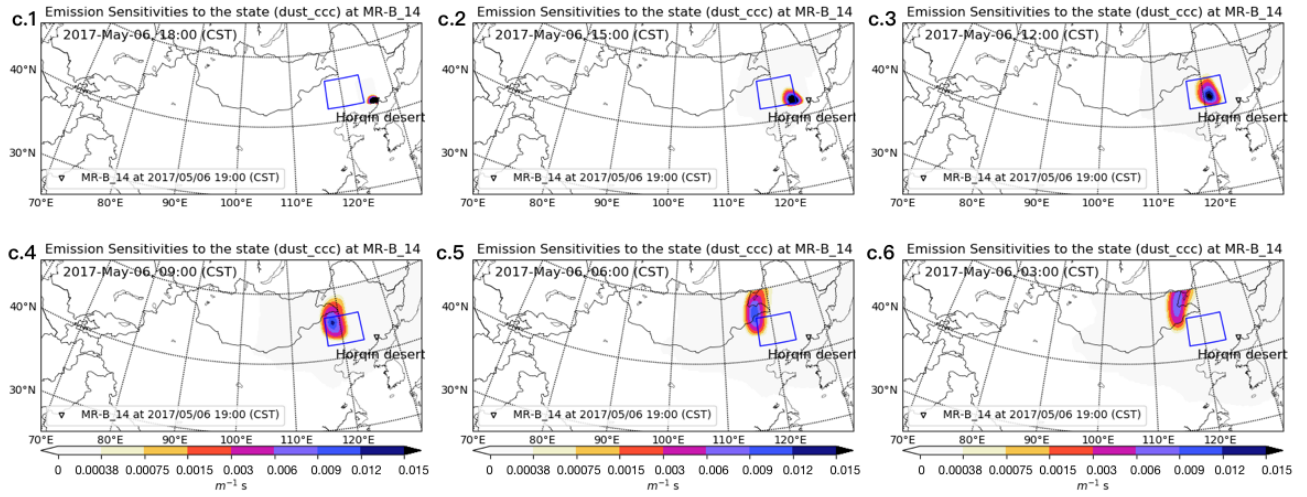

**Figure S2.** Backward time series of emission sensitivity of the dust simulation at MR-B\_14 2017 May 06, 19:00 CST: emission sensitivity distribution at 2017 May 06, 18:00 (c.1), 15:00 (c.2), 12:00 (c.3), 09:00 (c.4), 06:00 (c.5), 03:00 (c.6).
